# Supplementary material
Source: Royal Society of Chemistry journal article supplement (doi:10.1039/d6cp00305b)
Supplement: d6cp00305b1.pdf [file d6cp00305b1.pdf]

## Supplementary Information

# Bias-Induced NO Adsorption and Configurational Transitions on Cu(110): A Machine Learning enhanced First-Principles Grand Canonical Study

Thanh Ngoc Pham,<sup>a,b,\*</sup> Truc Thi Thanh Huynh,<sup>a,b</sup> Trinh Thi Hong<sup>a,b</sup>

<sup>a</sup>An Giang University, An Giang, Vietnam

<sup>b</sup>Vietnam National University, Ho Chi Minh city, 700000, Vietnam

Emails: [pnthanh@agu.edu.vn](mailto:pnthanh@agu.edu.vn)

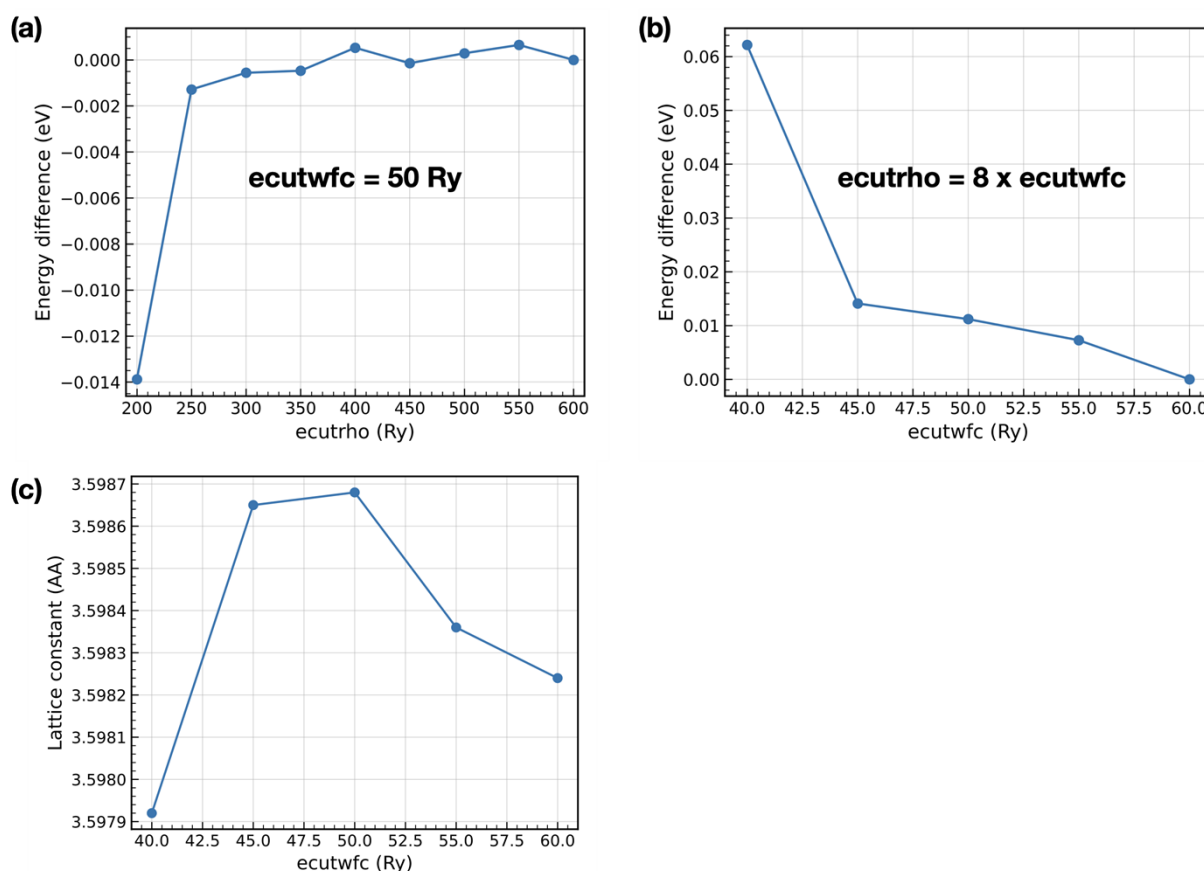

Fig S1. (a) Energy change of isolated NO as a function of the augmented charge density cutoff (ecutrho), with the wave function cutoff fixed at  $ecutwfc = 50$  Ry. (b) Energy change of isolated NO as a function of the wave function cutoff (ecutwfc). (c) Lattice constant of bulk fcc Cu as a function of  $ecutwfc$ .

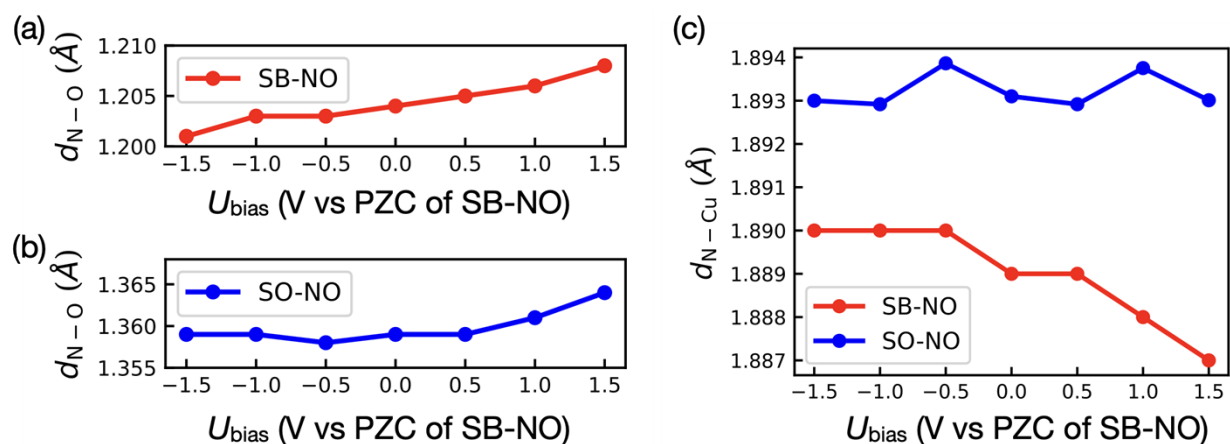

**Fig. S2.** NO bond length ( $d_{\text{N-O}}$ ) of (a) SB-NO and (b) SO-NO, along with the (c) average bond length between the N atom and the nearest surface Cu atoms ( $d_{\text{N-Cu}}$ ), as a function of the applied GCE bias voltage ( $U_{\text{bias}}$ ) relative to the PZC of SB-NO.

### S1. QE input for SB-NO with +1V bias

```

&CONTROL
calculation      = 'relax'
outdir           = './out/'
prefix           = 'no'
pseudo_dir       = '/home/thanhpn/QE/pslibrary.1.0.0/pbe/PSEUDOPOTENTIALS/'
restart_mode     = 'restart'
/

&SYSTEM
ecutwfc          = 50
ecutrho          = 400
occupations      = 'smearing'
degauss          = 0.01
smearing         = 'cold'
nspin            = 1

```

```
input_dft      = 'vdW-DF3-opt1'
assume_isolated = 'esm'
esm_bc        = 'bc3'
ntyp          = 3
nat           = 44
ibrav         = 0
lgscf = .TRUE.
gscf_mu = -4.1454
gscf_conv_thr = 1.d-3
/
&ELECTRONS
conv_thr      = 1e-07
mixing_mode   = 'local-TF'
mixing_beta   = 0.3
/
&IONS
ion_dynamics  = 'bfgs'
/
&CELL
cell_dynamics = 'bfgs'
/

ATOMIC_SPECIES
Cu 63.546 Cu.pbe-dn-rrkjus_psl.1.0.0.UPF
O 15.999 O.pbe-n-rrkjus_psl.1.0.0.UPF
N 14.007 N.pbe-n-rrkjus_psl.1.0.0.UPF

K_POINTS automatic
6 6 1 1 1 0

CELL_PARAMETERS angstrom
```

7.15600000000000 0.00000000000000 0.00000000000000  
0.00000000000000 7.59008418925640 0.00000000000000  
0.00000000000000 0.00000000000000 32.54551370160000

ATOMIC\_POSITIONS angstrom

|    |              |              |               |   |   |   |
|----|--------------|--------------|---------------|---|---|---|
| Cu | 0.0000000000 | 0.0000000000 | -2.5299579054 | 0 | 0 | 0 |
| Cu | 3.5780000000 | 0.0000000000 | -2.5299579054 | 0 | 0 | 0 |
| Cu | 0.0000000000 | 2.5300280631 | -2.5299579054 | 0 | 0 | 0 |
| Cu | 3.5780000000 | 2.5300280631 | -2.5299579054 | 0 | 0 | 0 |
| Cu | 0.0000000000 | 5.0600561262 | -2.5299579054 | 0 | 0 | 0 |
| Cu | 3.5780000000 | 5.0600561262 | -2.5299579054 | 0 | 0 | 0 |
| Cu | 1.7890000000 | 1.2650140315 | -1.2649438738 | 0 | 0 | 0 |
| Cu | 5.3670000000 | 1.2650140315 | -1.2649438738 | 0 | 0 | 0 |
| Cu | 1.7890000000 | 3.7950420946 | -1.2649438738 | 0 | 0 | 0 |
| Cu | 5.3670000000 | 3.7950420946 | -1.2649438738 | 0 | 0 | 0 |
| Cu | 1.7890000000 | 6.3250701577 | -1.2649438738 | 0 | 0 | 0 |
| Cu | 5.3670000000 | 6.3250701577 | -1.2649438738 | 0 | 0 | 0 |
| Cu | 0.0000000000 | 0.0000000000 | 0.0000701577  | 0 | 0 | 0 |
| Cu | 3.5780000000 | 0.0000000000 | 0.0000701577  | 0 | 0 | 0 |
| Cu | 0.0000000000 | 2.5300280631 | 0.0000701577  | 0 | 0 | 0 |
| Cu | 3.5780000000 | 2.5300280631 | 0.0000701577  | 0 | 0 | 0 |
| Cu | 0.0000000000 | 5.0600561262 | 0.0000701577  | 0 | 0 | 0 |
| Cu | 3.5780000000 | 5.0600561262 | 0.0000701577  | 0 | 0 | 0 |
| Cu | 1.7890000000 | 1.2650140315 | 1.2650841893  | 0 | 0 | 0 |
| Cu | 5.3670000000 | 1.2650140315 | 1.2650841893  | 0 | 0 | 0 |
| Cu | 1.7890000000 | 3.7950420946 | 1.2650841893  | 0 | 0 | 0 |
| Cu | 5.3670000000 | 3.7950420946 | 1.2650841893  | 0 | 0 | 0 |
| Cu | 1.7890000000 | 6.3250701577 | 1.2650841893  | 0 | 0 | 0 |
| Cu | 5.3670000000 | 6.3250701577 | 1.2650841893  | 0 | 0 | 0 |
| O  | 0.0007536041 | 1.2828188262 | 7.6317980662  |   |   |   |
| N  | 0.0062065726 | 1.2830477445 | 6.4252411992  |   |   |   |

|    |              |               |              |
|----|--------------|---------------|--------------|
| Cu | 0.0087087388 | -0.0266675301 | 5.0598083282 |
| Cu | 3.5855218221 | 0.0176779431  | 4.9491007889 |
| Cu | 0.0073611256 | 2.5914428035  | 5.0593086152 |
| Cu | 3.5856228740 | 2.5490021771  | 4.9488036871 |
| Cu | 0.0077121465 | 5.0777059915  | 4.9720195572 |
| Cu | 3.5860280452 | 5.0781135666  | 4.9558294991 |
| Cu | 1.8164995600 | 1.2779701112  | 3.7844531339 |
| Cu | 5.3520215647 | 1.2779225071  | 3.7841854622 |
| Cu | 1.7866995139 | 3.8017819166  | 3.8227068973 |
| Cu | 5.3825024149 | 3.8018467166  | 3.8224445318 |
| Cu | 1.7875375531 | 6.3446713030  | 3.8227995642 |
| Cu | 5.3821814040 | 6.3452065570  | 3.8230024487 |
| Cu | 0.0036256244 | 0.0107705275  | 2.5495158028 |
| Cu | 3.5808943035 | -0.0048086515 | 2.5044837162 |
| Cu | 0.0035914201 | 2.5314928533  | 2.5489822414 |
| Cu | 3.5808240913 | 2.5457928714  | 2.5042610156 |
| Cu | 0.0032199949 | 5.0660884673  | 2.5152401044 |
| Cu | 3.5811515855 | 5.0651604847  | 2.5244624781 |

## S2. QE input for SO-NO with +1V bias

&CONTROL

calculation = 'relax'

outdir = './out/'

prefix = 'no'

pseudo\_dir = '/home/thanhpn/QE/pslibrary.1.0.0/pbe/PSEUDOPOTENTIALS/'

restart\_mode = 'restart'

/

&SYSTEM

ecutwfc = 50

ecutrho = 400

```
occupations = 'smearing'
degauss      = 0.01
smearing     = 'cold'
nspin        = 1
input_dft    = 'vdW-DF3-opt1'
assume_isolated = 'esm'
esm_bc       = 'bc3'
ntyp         = 3
nat          = 44
ibrav        = 0
lgcscf = .TRUE.
gcscf_mu = -4.1454
gcscf_conv_thr = 1.d-3
/
&ELECTRONS
conv_thr     = 1e-07
mixing_mode  = 'local-TF'
mixing_beta  = 0.3
/
&IONS
ion_dynamics = 'bfgs'
/
&CELL
cell_dynamics = 'bfgs'
/

ATOMIC_SPECIES
Cu 63.546 Cu.pbe-dn-rrkjus_psl.1.0.0.UPF
O 15.999 O.pbe-n-rrkjus_psl.1.0.0.UPF
N 14.007 N.pbe-n-rrkjus_psl.1.0.0.UPF
```

K\_POINTS automatic

6 6 1 1 1 0

CELL\_PARAMETERS angstrom

7.15600000000000 0.00000000000000 0.00000000000000  
0.00000000000000 7.59008418925640 0.00000000000000  
0.00000000000000 0.00000000000000 32.54551370160000

ATOMIC\_POSITIONS angstrom

|    |              |              |               |   |   |   |
|----|--------------|--------------|---------------|---|---|---|
| Cu | 0.0000000000 | 0.0000000000 | -2.5299579054 | 0 | 0 | 0 |
| Cu | 3.5780000000 | 0.0000000000 | -2.5299579054 | 0 | 0 | 0 |
| Cu | 0.0000000000 | 2.5300280631 | -2.5299579054 | 0 | 0 | 0 |
| Cu | 3.5780000000 | 2.5300280631 | -2.5299579054 | 0 | 0 | 0 |
| Cu | 0.0000000000 | 5.0600561262 | -2.5299579054 | 0 | 0 | 0 |
| Cu | 3.5780000000 | 5.0600561262 | -2.5299579054 | 0 | 0 | 0 |
| Cu | 1.7890000000 | 1.2650140315 | -1.2649438738 | 0 | 0 | 0 |
| Cu | 5.3670000000 | 1.2650140315 | -1.2649438738 | 0 | 0 | 0 |
| Cu | 1.7890000000 | 3.7950420946 | -1.2649438738 | 0 | 0 | 0 |
| Cu | 5.3670000000 | 3.7950420946 | -1.2649438738 | 0 | 0 | 0 |
| Cu | 1.7890000000 | 6.3250701577 | -1.2649438738 | 0 | 0 | 0 |
| Cu | 5.3670000000 | 6.3250701577 | -1.2649438738 | 0 | 0 | 0 |
| Cu | 0.0000000000 | 0.0000000000 | 0.0000701577  | 0 | 0 | 0 |
| Cu | 3.5780000000 | 0.0000000000 | 0.0000701577  | 0 | 0 | 0 |
| Cu | 0.0000000000 | 2.5300280631 | 0.0000701577  | 0 | 0 | 0 |
| Cu | 3.5780000000 | 2.5300280631 | 0.0000701577  | 0 | 0 | 0 |
| Cu | 0.0000000000 | 5.0600561262 | 0.0000701577  | 0 | 0 | 0 |
| Cu | 3.5780000000 | 5.0600561262 | 0.0000701577  | 0 | 0 | 0 |
| Cu | 1.7890000000 | 1.2650140315 | 1.2650841893  | 0 | 0 | 0 |
| Cu | 5.3670000000 | 1.2650140315 | 1.2650841893  | 0 | 0 | 0 |
| Cu | 1.7890000000 | 3.7950420946 | 1.2650841893  | 0 | 0 | 0 |
| Cu | 5.3670000000 | 3.7950420946 | 1.2650841893  | 0 | 0 | 0 |

|    |               |               |              |   |   |   |
|----|---------------|---------------|--------------|---|---|---|
| Cu | 1.7890000000  | 6.3250701577  | 1.2650841893 | 0 | 0 | 0 |
| Cu | 5.3670000000  | 6.3250701577  | 1.2650841893 | 0 | 0 | 0 |
| O  | 2.4711251193  | 1.2831072140  | 6.1850147707 |   |   |   |
| N  | 1.1738078374  | 1.2815034517  | 5.7470207062 |   |   |   |
| Cu | 0.0362430281  | -0.0593610299 | 5.0392235020 |   |   |   |
| Cu | 3.6289571152  | -0.0005432251 | 5.0629710777 |   |   |   |
| Cu | 0.0340926521  | 2.6187012281  | 5.0373180071 |   |   |   |
| Cu | 3.6264829885  | 2.5679578285  | 5.0612511019 |   |   |   |
| Cu | 0.0147718403  | 5.0755321410  | 4.9641148940 |   |   |   |
| Cu | 3.5884075759  | 5.0784684338  | 4.9625667195 |   |   |   |
| Cu | 1.7822858682  | 1.2789393310  | 3.7359476320 |   |   |   |
| Cu | 5.3757389214  | 1.2778868972  | 3.8245944471 |   |   |   |
| Cu | 1.8108809449  | 3.8332076758  | 3.7816214441 |   |   |   |
| Cu | 5.3699702856  | 3.7870688915  | 3.8541204316 |   |   |   |
| Cu | 1.8114589048  | 6.3152690028  | 3.7829334346 |   |   |   |
| Cu | 5.3707209350  | 6.3593290390  | 3.8544143387 |   |   |   |
| Cu | -0.0133723937 | 0.0024504144  | 2.5322478377 |   |   |   |
| Cu | 3.5910621763  | 0.0090919260  | 2.5394116621 |   |   |   |
| Cu | -0.0138812533 | 2.5412161075  | 2.5320613978 |   |   |   |
| Cu | 3.5912507473  | 2.5341035043  | 2.5394769644 |   |   |   |
| Cu | -0.0193474972 | 5.0664806010  | 2.5207919019 |   |   |   |
| Cu | 3.6010152451  | 5.0662046488  | 2.5180035503 |   |   |   |

### S3. QE input for SB-NO with -0.1e

&CONTROL

calculation = 'relax'

disk\_io = 'none'

pseudo\_dir = '/home/thanhpn/QE/pslibrary.1.0.0/pbe/PSEUDOPOTENTIALS/'

/

&SYSTEM

ecutwfc = 50

```
ecutrho      = 400
occupations  = 'smearing'
degauss      = 0.01
smearing     = 'cold'
nspin       = 1
input_dft    = 'vdW-DF3-opt1'
assume_isolated = 'esm'
esm_bc      = 'bc3'
tot_charge   = -0.1,
ntyp        = 3
nat         = 44
ibrav       = 0
/
&ELECTRONS
conv_thr     = 1e-07
mixing_mode  = 'plain'
mixing_beta  = 0.3
/
&IONS
ion_dynamics = 'bfgs'
/
&CELL
cell_dynamics = 'bfgs'
/

ATOMIC_SPECIES
Cu 63.546 Cu.pbe-dn-rrkjus_psl.1.0.0.UPF
O 15.999 O.pbe-n-rrkjus_psl.1.0.0.UPF
N 14.007 N.pbe-n-rrkjus_psl.1.0.0.UPF

K_POINTS automatic
```

6 6 1 1 1 0

CELL\_PARAMETERS angstrom

7.15600000000000 0.00000000000000 0.00000000000000  
0.00000000000000 7.59008418925640 0.00000000000000  
0.00000000000000 0.00000000000000 32.54551370160000

ATOMIC\_POSITIONS angstrom

|    |              |              |               |   |   |   |
|----|--------------|--------------|---------------|---|---|---|
| Cu | 3.5813351705 | 5.0650099596 | 2.5234310854  |   |   |   |
| Cu | 0.0000000000 | 0.0000000000 | -2.5299579054 | 0 | 0 | 0 |
| Cu | 3.5780000000 | 0.0000000000 | -2.5299579054 | 0 | 0 | 0 |
| Cu | 0.0000000000 | 2.5300280631 | -2.5299579054 | 0 | 0 | 0 |
| Cu | 3.5780000000 | 2.5300280631 | -2.5299579054 | 0 | 0 | 0 |
| Cu | 0.0000000000 | 5.0600561262 | -2.5299579054 | 0 | 0 | 0 |
| Cu | 3.5780000000 | 5.0600561262 | -2.5299579054 | 0 | 0 | 0 |
| Cu | 1.7890000000 | 1.2650140315 | -1.2649438738 | 0 | 0 | 0 |
| Cu | 5.3670000000 | 1.2650140315 | -1.2649438738 | 0 | 0 | 0 |
| Cu | 1.7890000000 | 3.7950420946 | -1.2649438738 | 0 | 0 | 0 |
| Cu | 5.3670000000 | 3.7950420946 | -1.2649438738 | 0 | 0 | 0 |
| Cu | 1.7890000000 | 6.3250701577 | -1.2649438738 | 0 | 0 | 0 |
| Cu | 5.3670000000 | 6.3250701577 | -1.2649438738 | 0 | 0 | 0 |
| Cu | 0.0000000000 | 0.0000000000 | 0.0000701577  | 0 | 0 | 0 |
| Cu | 3.5780000000 | 0.0000000000 | 0.0000701577  | 0 | 0 | 0 |
| Cu | 0.0000000000 | 2.5300280631 | 0.0000701577  | 0 | 0 | 0 |
| Cu | 3.5780000000 | 2.5300280631 | 0.0000701577  | 0 | 0 | 0 |
| Cu | 0.0000000000 | 5.0600561262 | 0.0000701577  | 0 | 0 | 0 |
| Cu | 3.5780000000 | 5.0600561262 | 0.0000701577  | 0 | 0 | 0 |
| Cu | 1.7890000000 | 1.2650140315 | 1.2650841893  | 0 | 0 | 0 |
| Cu | 5.3670000000 | 1.2650140315 | 1.2650841893  | 0 | 0 | 0 |
| Cu | 1.7890000000 | 3.7950420946 | 1.2650841893  | 0 | 0 | 0 |
| Cu | 5.3670000000 | 3.7950420946 | 1.2650841893  | 0 | 0 | 0 |

|    |              |               |              |   |   |   |
|----|--------------|---------------|--------------|---|---|---|
| Cu | 1.7890000000 | 6.3250701577  | 1.2650841893 | 0 | 0 | 0 |
| Cu | 5.3670000000 | 6.3250701577  | 1.2650841893 | 0 | 0 | 0 |
| O  | 0.0006506065 | 1.2827451407  | 7.6337789574 |   |   |   |
| N  | 0.0063118993 | 1.2832083832  | 6.4226727922 |   |   |   |
| Cu | 0.0091239313 | -0.0284302821 | 5.0611039603 |   |   |   |
| Cu | 3.5859974526 | 0.0185139160  | 4.9486214090 |   |   |   |
| Cu | 0.0076942926 | 2.5933917337  | 5.0607875660 |   |   |   |
| Cu | 3.5861078995 | 2.5493558810  | 4.9485783967 |   |   |   |
| Cu | 0.0080448563 | 5.0780795110  | 4.9712548093 |   |   |   |
| Cu | 3.5865255466 | 5.0787021557  | 4.9545919333 |   |   |   |
| Cu | 1.8163209312 | 1.2781113194  | 3.7853563102 |   |   |   |
| Cu | 5.3528296127 | 1.2781143844  | 3.7848049947 |   |   |   |
| Cu | 1.7870465778 | 3.8019972349  | 3.8243735911 |   |   |   |
| Cu | 5.3830288208 | 3.8020806301  | 3.8240930675 |   |   |   |
| Cu | 1.7879449712 | 6.3450166781  | 3.8246057412 |   |   |   |
| Cu | 5.3826643722 | 6.3456144473  | 3.8247697065 |   |   |   |
| Cu | 0.0037777696 | 0.0102482205  | 2.5498667778 |   |   |   |
| Cu | 3.5809806244 | -0.0052282364 | 2.5041147179 |   |   |   |
| Cu | 0.0037488062 | 2.5316890074  | 2.5492641253 |   |   |   |
| Cu | 3.5808878887 | 2.5458843225  | 2.5040729443 |   |   |   |
| Cu | 0.0033938005 | 5.0660527987  | 2.5147560183 |   |   |   |
| Cu | 3.5813280636 | 5.0650294817  | 2.5233597928 |   |   |   |

#### **S4. QE input for SO-NO with -0.1e**

&CONTROL

calculation = 'relax'

disk\_io = 'none'

pseudo\_dir = '/home/thanhpn/QE/pslibrary.1.0.0/pbe/PSEUDOPOTENTIALS/'

/

&SYSTEM

ecutwfc = 50

ecutrho = 400

```
occupations = 'smearing'
degauss = 0.01
smearing = 'cold'
nspin = 1
input_dft = 'vdW-DF3-opt1'
assume_isolated = 'esm'
esm_bc = 'bc3'
tot_charge = -0.1,
ntyp = 3
nat = 44
ibrav = 0
/
&ELECTRONS
conv_thr = 1e-07
mixing_mode = 'plain'
mixing_beta = 0.3
/
&IONS
ion_dynamics = 'bfgs'
/
&CELL
cell_dynamics = 'bfgs'
/

ATOMIC_SPECIES
Cu 63.546 Cu.pbe-dn-rrkjus_psl.1.0.0.UPF
O 15.999 O.pbe-n-rrkjus_psl.1.0.0.UPF
N 14.007 N.pbe-n-rrkjus_psl.1.0.0.UPF

K_POINTS automatic
6 6 1 1 1 0
```

CELL\_PARAMETERS angstrom

7.15600000000000 0.00000000000000 0.00000000000000  
0.00000000000000 7.59008418925640 0.00000000000000  
0.00000000000000 0.00000000000000 32.5455137016000

ATOMIC\_POSITIONS angstrom

|    |              |              |               |   |   |   |
|----|--------------|--------------|---------------|---|---|---|
| O  | 2.4735216081 | 1.2830970045 | 6.1865847184  |   |   |   |
| N  | 1.1715853515 | 1.2814386232 | 5.7464145984  |   |   |   |
| Cu | 0.0000000000 | 0.0000000000 | -2.5299579054 | 0 | 0 | 0 |
| Cu | 3.5780000000 | 0.0000000000 | -2.5299579054 | 0 | 0 | 0 |
| Cu | 0.0000000000 | 2.5300280631 | -2.5299579054 | 0 | 0 | 0 |
| Cu | 3.5780000000 | 2.5300280631 | -2.5299579054 | 0 | 0 | 0 |
| Cu | 0.0000000000 | 5.0600561262 | -2.5299579054 | 0 | 0 | 0 |
| Cu | 3.5780000000 | 5.0600561262 | -2.5299579054 | 0 | 0 | 0 |
| Cu | 1.7890000000 | 1.2650140315 | -1.2649438738 | 0 | 0 | 0 |
| Cu | 5.3670000000 | 1.2650140315 | -1.2649438738 | 0 | 0 | 0 |
| Cu | 1.7890000000 | 3.7950420946 | -1.2649438738 | 0 | 0 | 0 |
| Cu | 5.3670000000 | 3.7950420946 | -1.2649438738 | 0 | 0 | 0 |
| Cu | 1.7890000000 | 6.3250701577 | -1.2649438738 | 0 | 0 | 0 |
| Cu | 5.3670000000 | 6.3250701577 | -1.2649438738 | 0 | 0 | 0 |
| Cu | 0.0000000000 | 0.0000000000 | 0.0000701577  | 0 | 0 | 0 |
| Cu | 3.5780000000 | 0.0000000000 | 0.0000701577  | 0 | 0 | 0 |
| Cu | 0.0000000000 | 2.5300280631 | 0.0000701577  | 0 | 0 | 0 |
| Cu | 3.5780000000 | 2.5300280631 | 0.0000701577  | 0 | 0 | 0 |
| Cu | 0.0000000000 | 5.0600561262 | 0.0000701577  | 0 | 0 | 0 |
| Cu | 3.5780000000 | 5.0600561262 | 0.0000701577  | 0 | 0 | 0 |
| Cu | 1.7890000000 | 1.2650140315 | 1.2650841893  | 0 | 0 | 0 |
| Cu | 5.3670000000 | 1.2650140315 | 1.2650841893  | 0 | 0 | 0 |
| Cu | 1.7890000000 | 3.7950420946 | 1.2650841893  | 0 | 0 | 0 |
| Cu | 5.3670000000 | 3.7950420946 | 1.2650841893  | 0 | 0 | 0 |

|    |               |               |              |   |   |   |
|----|---------------|---------------|--------------|---|---|---|
| Cu | 1.7890000000  | 6.3250701577  | 1.2650841893 | 0 | 0 | 0 |
| Cu | 5.3670000000  | 6.3250701577  | 1.2650841893 | 0 | 0 | 0 |
| Cu | 0.0360428514  | -0.0596090367 | 5.0394752108 |   |   |   |
| Cu | 3.6292746586  | -0.0011512420 | 5.0627168942 |   |   |   |
| Cu | 0.0338297467  | 2.6188338807  | 5.0375911774 |   |   |   |
| Cu | 3.6268652677  | 2.5683261327  | 5.0610426480 |   |   |   |
| Cu | 0.0147086463  | 5.0754895025  | 4.9642801909 |   |   |   |
| Cu | 3.5879878330  | 5.0783973084  | 4.9626056721 |   |   |   |
| Cu | 1.7820063221  | 1.2787978950  | 3.7363503962 |   |   |   |
| Cu | 5.3757151935  | 1.2777620357  | 3.8250667006 |   |   |   |
| Cu | 1.8107996475  | 3.8330168935  | 3.7822305016 |   |   |   |
| Cu | 5.3700049229  | 3.7870045343  | 3.8545230158 |   |   |   |
| Cu | 1.8113444138  | 6.3152995759  | 3.7834616654 |   |   |   |
| Cu | 5.3707265743  | 6.3593483257  | 3.8548542434 |   |   |   |
| Cu | -0.0134056468 | 0.0022588572  | 2.5322842278 |   |   |   |
| Cu | 3.5907440528  | 0.0089672231  | 2.5396234983 |   |   |   |
| Cu | -0.0138957885 | 2.5412902155  | 2.5320018249 |   |   |   |
| Cu | 3.5909096514  | 2.5341122653  | 2.5395417041 |   |   |   |
| Cu | -0.0194670229 | 5.0665125302  | 2.5207672206 |   |   |   |
| Cu | 3.6008612161  | 5.0662297702  | 2.5176755663 |   |   |   |

## S5. Catlearn input for NEB

```
from ase.io import read
from ase.neb import NEB
from ase.optimize import MDMin
from ase.calculators.espresso import Espresso
from catlearn.optimize.mlneb import MLNEB
from ase.neb import NEBTools
from ase.parallel import parprint
from catlearn.optimize.tools import plotneb
```

```
import copy
```

```
pseudopotentials = {'N': 'N.pbe-n-rrkjus_psl.1.0.0.UPF',  
                    'O': 'O.pbe-n-rrkjus_psl.1.0.0.UPF',  
                    'Cu': 'Cu.pbe-dn-rrkjus_psl.1.0.0.UPF'}
```

```
pseudo_dir='/home/thanhpn/QE/pslibrary.1.0.0/pbe/PSEUDOPOTENTIALS/'
```

```
input_data = {  
    'system': {  
        'ecutwfc': 50,  
        'ecutrho': 400,  
        'assume_isolated': 'esm',  
        'esm_bc': 'bc3',  
        'tot_charge': -0.1,  
        'input_dft': 'vdW-DF3-opt1',  
        'occupations': 'smearing',  
        'degauss': 0.01,  
        'smearing': 'cold'},  
    'ions': {  
        'ion_dynamics': 'bfgs'},  
    'cell': {  
        'cell_dynamics': 'bfgs'} }
```

```
calc = Espresso(calculation = 'scf', input_data=input_data, disk_io = 'none',  
                pseudopotentials=pseudopotentials, tprnfor = True,  
                kpts = (6,6,1), nspin = 1, koffset = (1, 1,0),  
                mixing_mode = 'plain', mixing_beta = 0.3, conv_thr = 1.0e-7,  
                pseudo_dir=pseudo_dir)
```

```
n_images = 7
```

```
neb_catlearn = MLNEB(start='sb.traj',  
                     end='so.traj',  
                     ase_calc=calc,  
                     n_images=n_images,  
                     interpolation='idpp', restart=False)
```

```
neb_catlearn.run(fmax=0.05, trajectory='ML-NEB.traj', sequential=True, full_output=True)
```
